# Supplementary material for: The role of three interleukin 10 gene polymorphisms (− 1082 A > G, − 819 C > T, − 592 A > C) in the risk of chronic and aggressive periodontitis: a meta-analysis and trial sequential analysis
Source: Springer Nature journal article supplement (doi:10.1186/s12903-018-0637-9), 2018-10-22
Supplement: MOESM6 [file 16217344]

Additional File 6. Recessive model of -1082 A> G in non-Asian patients stratified by diagnostic criteria

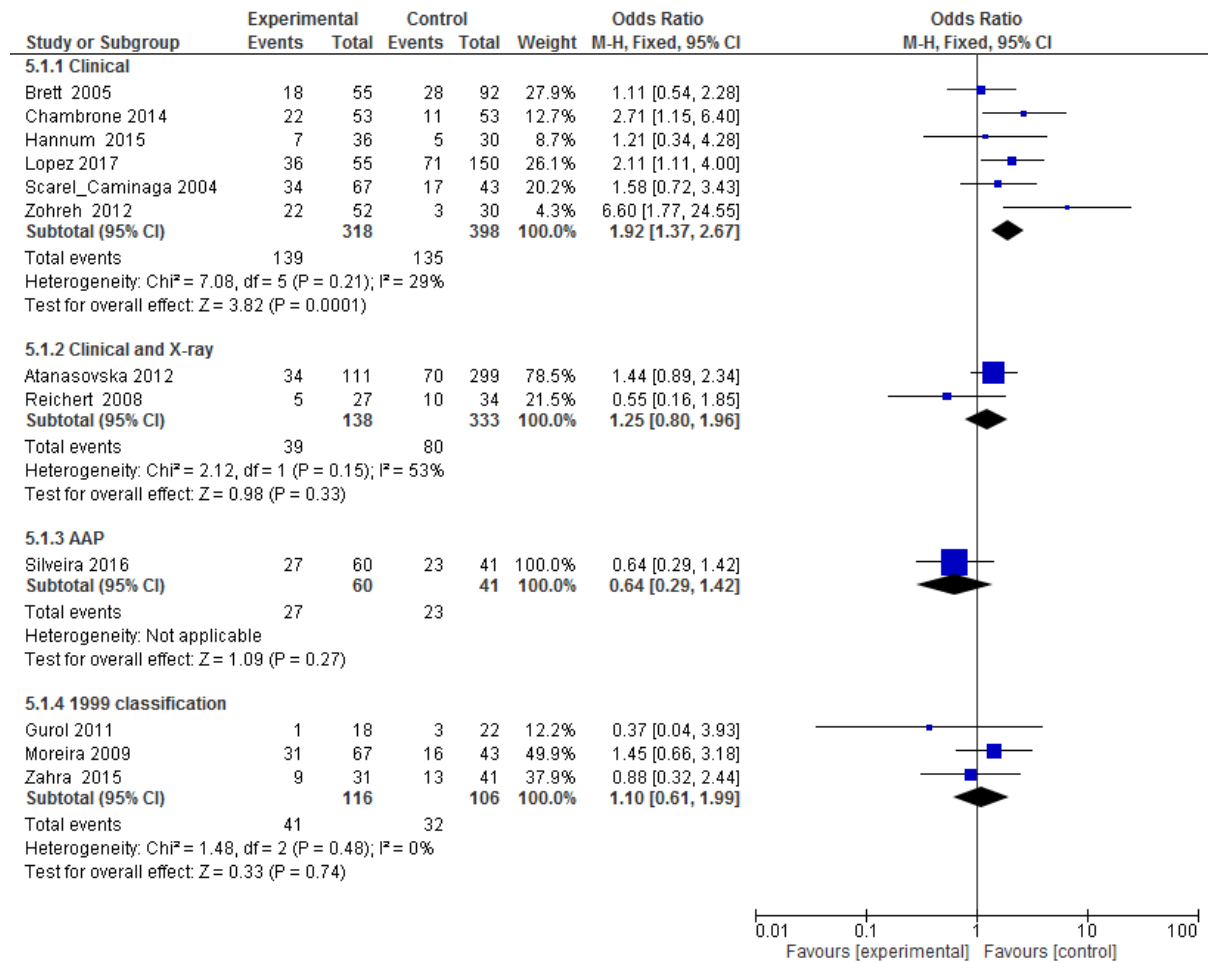

Clinical: Clinical diagnosis; Clinical & X-ray: Clinical diagnosis, followed by X-ray verification;

1999 classification: 1999 classification of periodontal diseases and conditions; AAP: American Academy of Periodontology criteria.

The boxes show the effect estimates from the individual studies, while the diamond shows the pooled result.

The I<sup>2</sup> value 0 % indicates an absence of heterogeneity. A fixed effect model was used in the absence of heterogeneity.
