# Supplementary material for: The role of three interleukin 10 gene polymorphisms (− 1082 A > G, − 819 C > T, − 592 A > C) in the risk of chronic and aggressive periodontitis: a meta-analysis and trial sequential analysis
Source: Springer Nature journal article supplement (doi:10.1186/s12903-018-0637-9), 2018-10-22

Additional File 7. Funnel plot of comparison: TNF 308 -1082 A>G dominant model

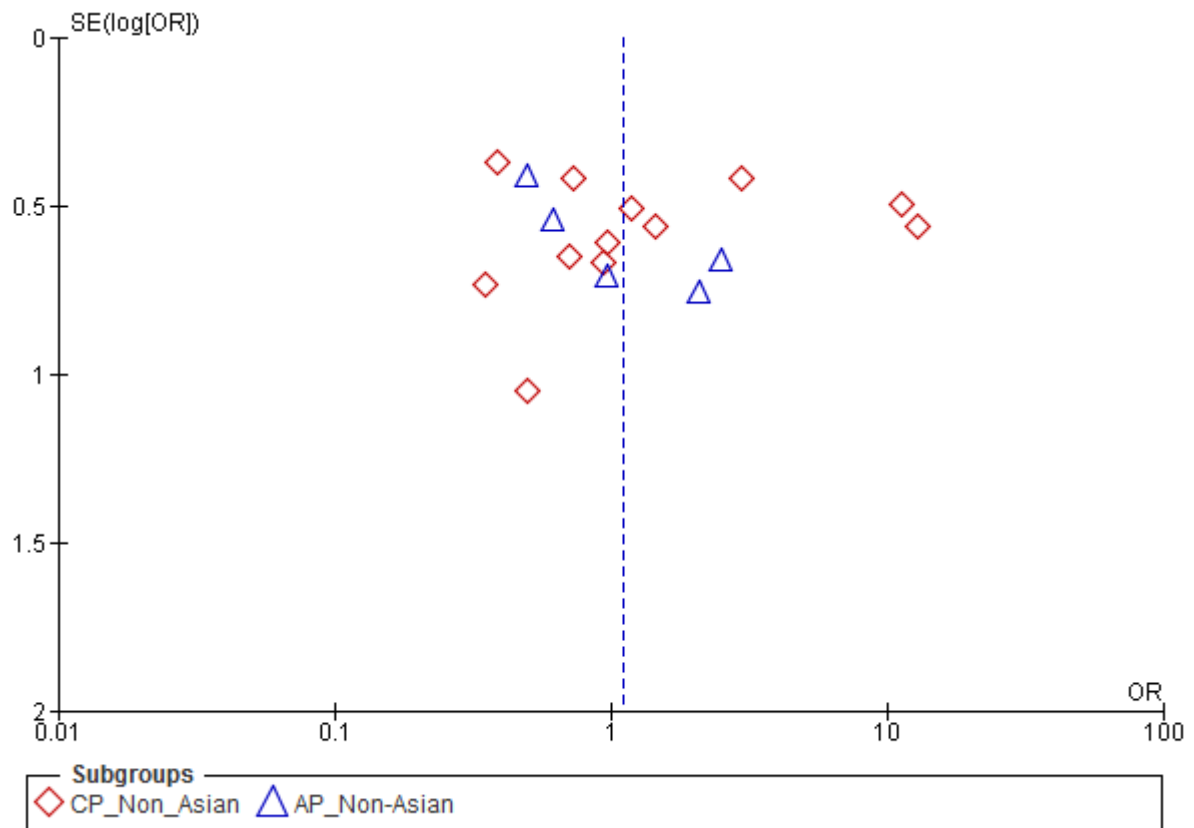

Supplement: MOESM7 [file 16217344]
